# Supplementary material for: Transcriptome-Wide Study Revealed That N6-Methyladenosine Participates in Regulation Meat Production in Goats
Source: MDPI journal article supplement (doi:10.3390/foods12061159), 2023-03-09
Supplement: s1 [file s1]

**Supplementary Table S1.** Dietary ingredients and nutrient content of basal diets in goats.

| <b>Ingredients</b>      | <b>Content(%)</b> | <b>Nutrition levels</b> | <b>Content(%)</b> |
|-------------------------|-------------------|-------------------------|-------------------|
| Corn                    | 16.80             | Crude protein           | 17.20             |
| Palm Kernel Expeller    | 20.50             | Neutral detergent fiber | 43.51             |
| Peanut vine             | 11.00             | Crude fat               | 2.7               |
| Soybean meal            | 4.00              | Calcium,Ca              | 0.69              |
| Molasses                | 2.00              | Total Phosphorus,TP     | 0.43              |
| Manioc waste            | 12.00             | Crude ash               | 7.76              |
| Bagasse                 | 6.00              | Nitrogen free exteact   | 51.2              |
| Corn skin               | 4.00              | Acid detergent fiber    | 22.65             |
| Cassava alcohol residue | 9.00              |                         |                   |
| rice mill by-product    | 5.00              |                         |                   |
| Urea                    | 1.20              |                         |                   |
| Dicalcium phosphate     | 0.40              |                         |                   |
| Limestone               | 1.00              |                         |                   |
| Bentonite               | 4.00              |                         |                   |
| Rumen protected fat     | 1.00              |                         |                   |
| Premix feed             | 2.10              |                         |                   |
| Total                   | 100.00            |                         |                   |

**Supplementary Table S2 . Summary of sequence data and read alignment statistics**

|           | Sample ID | Raw_Reads | Valid_Reads | Mapped reads     | Unique Mapped reads | m6A peaks/<br>m6A modified genes | Expressed gene |
|-----------|-----------|-----------|-------------|------------------|---------------------|----------------------------------|----------------|
| IP-seq    | NBY_1     | 76857182  | 75311702    | 63339205(95.06%) | 48017455(72.07%)    | 17043                            | 14924          |
|           | NBY_2     | 75517400  | 73964574    | 65359243(95.07%) | 49368439(71.81%)    | /1005                            |                |
|           | NBY_3     | 75484228  | 74360232    | 64469901(95.00%) | 48736154(71.82%)    | 7                                |                |
|           | DA_1      | 71898700  | 70467066    | 63275859(95.03%) | 47095979(70.73%)    | 17013                            |                |
|           | DA_2      | 72516484  | 70945312    | 63603638(94.94%) | 46750353(69.78%)    | /1024                            |                |
|           | DA_3      | 74159794  | 72778100    | 65084437(95.15%) | 48409880(70.77%)    | 7                                |                |
| Input-seq | NBY_1     | 69999430  | 69091326    | 57562200(94.93%) | 42342050(69.83%)    |                                  |                |

**Note:**NBY\_1,NBY\_2 and NBY\_3 mean the sample 1, sample 2 and sample 3 of muscle tissue from Nubian goats ,respectively. DA\_1,DA\_2 andDA\_3 mean the sample 1, sample 2 and sample 3 of muscle tissue from Duan goats ,respectively.

|       |          |          |                  |                  |       |
|-------|----------|----------|------------------|------------------|-------|
| NBY_2 | 73469490 | 72605266 | 64064223(95.00%) | 47337553(70.20%) | 13824 |
| NBY_3 | 73930092 | 73057100 | 61472094(94.41%) | 45704636(70.20%) | 14582 |
| DA_1  | 75670170 | 74845360 | 66609319(95.43%) | 49034233(70.25%) | 13894 |
| DA_2  | 75727778 | 74852736 | 66223736(94.59%) | 48157964(68.79%) | 13877 |
| DA_3  | 71977324 | 70970374 | 63274152(95.11%) | 45873121(68.95%) | 13918 |

**Supplementary Table S3.** Unique peaks and common peaks between IP and input.

| Tissue | Unique peaks | Represented transcripts | Common peaks | Total | Total peaks |             |      |            |       |
|--------|--------------|-------------------------|--------------|-------|-------------|-------------|------|------------|-------|
|        |              |                         |              |       | 5' UTR      | Start codon | CDS  | Stop codon | 3'UTR |
| NBY    | 8045         | 1143                    | 8998         | 17043 | 784         | 2983        | 5215 | 6016       | 2045  |
| DA     | 8015         | 1333                    |              | 17013 | 663         | 3198        | 4678 | 6620       | 1854  |

**Note:** NBY means the sample of muscle tissue from Nubian goats. DA means the sample of muscle tissue from Duan goats.
